# Supplementary material
Source: Springer Nature journal article supplement (https://www.springermedizin.de/resource/supplementary/13058_2011_2901_MOESM4_ESM.pdf/9702820)

**patient****xenograft****patient****xenograft**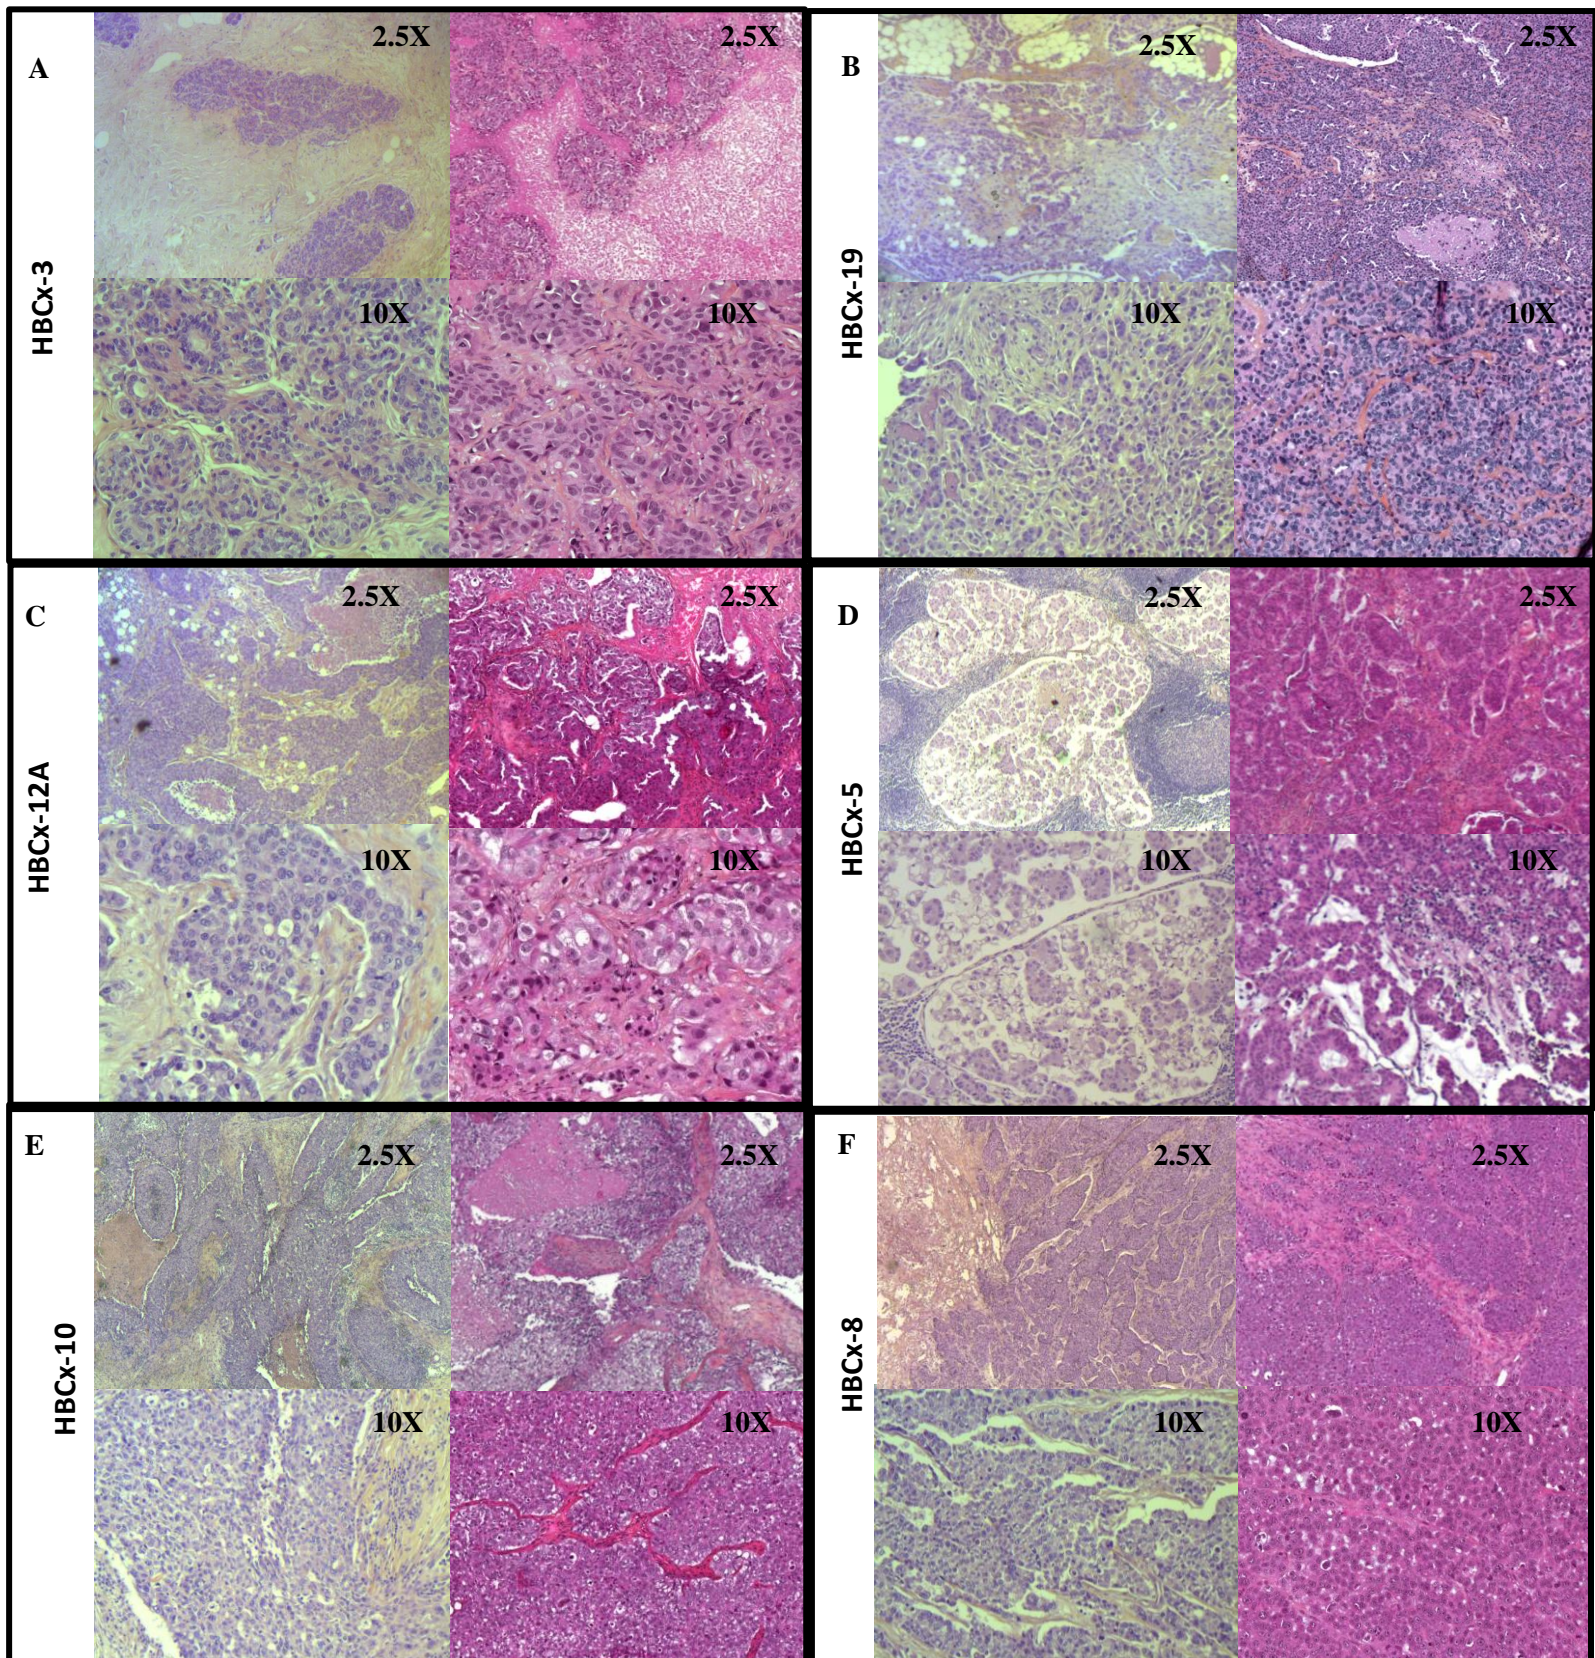

Supplement: MOESM4 [file 9702820]
